- extended contextual discrimination. *Hippocampus* 2012; 22:292–8
53. Santarelli L, Saxe M, Gross C, Surget A, Battaglia F, Dulawa S, Weisstaub N, Lee J, Duman R, Arancio O, Belzung C, Hen R: Requirement of hippocampal neurogenesis for the behavioral effects of antidepressants. *Science* 2003; 301:805–9
  54. Wu MV, Hen R: Functional dissociation of adult-born neurons along the dorsoventral axis of the dentate gyrus. *Hippocampus* 2014; 24:751–61
  55. Miller BR, Hen R: The current state of the neurogenic theory of depression and anxiety. *Curr Opin Neurobiol* 2015; 30:51–8
  56. Iyengar SS, LaFrancois JJ, Friedman D, Drew LJ, Denny CA, Burghardt NS, Wu MV, Hsieh J, Hen R, Scharfman HE: Suppression of adult neurogenesis increases the acute effects of kainic acid. *Exp Neurol* 2015; 264:135–49
  57. Cho KO, Lybrand ZR, Ito N, Brulet R, Tafacory F, Zhang L, Good L, Ure K, Kernie SG, Birnbaum SG, Scharfman HE, Eisch AJ, Hsieh J: Aberrant hippocampal neurogenesis contributes to epilepsy and associated cognitive decline. *Nat Commun* 2015; 6:6606
  58. Stratmann G, Lee J, Sall JW, Lee BH, Alvi RS, Shih J, Rowe AM, Ramage TM, Chang FL, Alexander TG, Lempert DK, Lin N, Siu KH, Elphick SA, Wong A, Schnair CI, Vu AF, Chan JT, Zai H, Wong MK, Anthony AM, Barbour KC, Ben-Tzur D, Kazarian NE, Lee JY, Shen JR, Liu E, Behniwal GS, Lammers CR, Quinones Z, Aggarwal A, Cedars E, Yonelinas AP, Ghetti S: Effect of general anesthesia in infancy on long-term recognition memory in humans and rats. *Neuropsychopharmacology* 2014; 39:2275–87

## ANESTHESIOLOGY REFLECTIONS FROM THE WOOD LIBRARY-MUSEUM

### Moynihan Syringe for Quinine and Urea Local Anesthesia

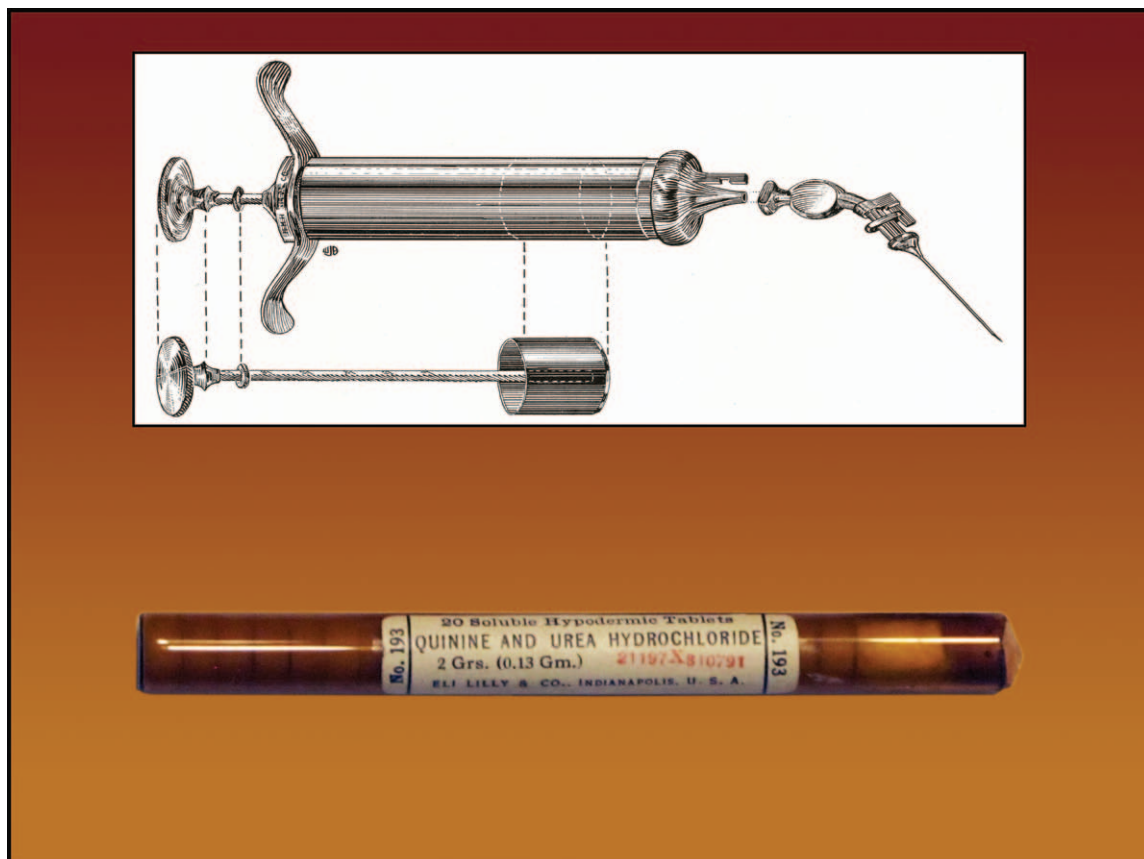

In his 1914 masterwork *Anoci-Association*, Cleveland surgeon George W. Crile, M.D. (1864 to 1943), depicted (top) the “Moynihan Syringe for the Infiltration of Quinin[e] and Urea Hydrochlorid[e].” His book was published seven years after the first publication about long-lasting local anesthesia and analgesia following injection of a mixture of quinine with urea. Manufactured by Eli Lilly & Company of Indianapolis, the glass tube (bottom) contained “20 soluble hypodermic tablets” with 2 grains or 0.13 grams of Quinine-Urea mixture. Although it was a long-acting local anesthetic and analgesic, the quinine-urea mixture could delay wound healing if directly injected into wound edges. And that is why Dr. Crile recommended use of a syringe with a long offset needle such as Moynihan’s for infiltrating “at a Distance from the Incision.” (Copyright © the American Society of Anesthesiologists’ Wood Library-Museum of Anesthesiology.)

George S. Bause, M.D., M.P.H., Honorary Curator, ASA’s Wood Library-Museum of Anesthesiology, Schaumburg, Illinois, and Clinical Associate Professor, Case Western Reserve University, Cleveland, Ohio. UJYC@aol.com.
